# Supplementary material for: Plastic waste discharge to the global ocean constrained by seawater observations
Source: PubMed Central journal article supplement (PMC10011382; doi:10.1038/s41467-023-37108-5), 2023-03-13
Supplement: 41467_2023_37108_MOESM1_ESM.pdf [file 41467_2023_37108_MOESM1_ESM.pdf]

1  
2  
3  
4 Supplementary Materials for  
5

6 **Plastic waste discharge to the global ocean constrained by seawater observations**

7 Yanxu Zhang<sup>1,2\*†</sup>, Peipei Wu<sup>1†</sup>, Ruochong Xu<sup>1</sup>, Xuantong Wang<sup>1</sup>, Lili Lei<sup>1\*</sup>, Amina T.  
8 Schartup<sup>3</sup>, Yiming Peng<sup>1</sup>, Qiaotong Pang<sup>1</sup>, Xinle Wang<sup>1</sup>, Lei Mai<sup>4</sup>, Ruwei Wang<sup>4</sup>, Huan Liu<sup>5</sup>,  
9 Xiaotong Wang<sup>5</sup>, Arjen Luijendijk<sup>6,7</sup>, Eric Chassignet<sup>8</sup>, Xiaobiao Xu<sup>8</sup>, Huizhong Shen<sup>9</sup>, Shuxiu  
10 Zheng<sup>10</sup>, Eddy Y. Zeng<sup>4\*</sup>

11 <sup>1</sup>School of Atmospheric Sciences, Nanjing University; Nanjing 210023, China.

12 <sup>2</sup>Frontiers Science Center for Critical Earth Material Cycling, Nanjing University; Nanjing  
13 210023, China

14 <sup>3</sup>Scripps Institution of Oceanography, University of California, San Diego; La Jolla, CA, USA.

15 <sup>4</sup>Center for Environmental Microplastics Studies, Guangdong Key Laboratory of Environmental  
16 Pollution and Health, School of Environment, Jinan University; Guangzhou 511443, China.

17 <sup>5</sup>State Key Joint Laboratory of ESPC, State Environmental Protection Key Laboratory of  
18 Sources and Control of Air Pollution Complex, School of Environment, Tsinghua University;  
19 Beijing, China.

20 <sup>6</sup>Faculty of Civil Engineering and Geosciences, Delft University of Technology; Delft,  
21 Netherlands.

22 <sup>7</sup>Hydraulic Engineering; Deltares, Delft, Netherlands.

23 <sup>8</sup>Center for Ocean-Atmospheric Prediction Studies (COAPS), Florida State University;  
24 Tallahassee, FL, United States.

25 <sup>9</sup>School of Environmental Science and Technology, Southern University of Science and  
26 Technology; Shenzhen, Guangdong, China.

27 <sup>10</sup>College of Urban and Environmental Sciences, Peking University; Beijing, China

28 \*Corresponding author. Email: YZ zhangyx@nju.edu.cn; LL lililei@nju.edu.cn; and EYZ  
29 eddyzeng@jnu.edu.cn

30 †These authors contributed equally.  
31  
32

## 33 **Supplementary Discussion**

### 34 Inclusion of seawater observations

35 Supplementary Table 8 lists the observed surface ocean plastic abundance data used in this  
36 study. Isobe et al. compiled a multilevel dataset that includes almost all available ocean plastic  
37 abundance data so far<sup>1</sup>. The Isobe database includes a total of 9959 data points obtained by  
38 Neuston net, WP2 net, Manta net, Bango net, and Plankton net. The identification method  
39 includes visual identification, FTIR (Fourier transform infrared spectrophotometer), and Raman  
40 spectroscopy. There is a large discrepancy among data obtained with a different method<sup>2,3</sup>. The  
41 risk of clogging and uncertainty in sample volumes also depends on the mesh size of the net and  
42 the flow conditions<sup>3</sup>. Visual inspection is known to lead to an overestimation of the particle  
43 count because 20-70% of the particles identified visually as plastics might be of other chemical  
44 compositions, e.g., coal ash, especially for the particle smaller than 500  $\mu\text{m}$ <sup>4,5</sup>. However, visual  
45 identification misses the transparent and small microplastics thus underestimating the plastic  
46 concentrations<sup>2</sup>. The data obtained by different methodologies are thus generally not comparable  
47 with each other. More importantly, different methodologies are used in different studies covering  
48 different ocean basins. A mixture of data obtained by different methodologies may distort the  
49 real spatial pattern of surface ocean plastic abundance and reduce the reliability of the  
50 comparison between simulations and observations. There is a trade-off between “more data” and  
51 “ghost spatial pattern” arising from different measurement methodologies. Therefore, we use  
52 only the dataset obtained by Neuston net and the visual identification method due to its large  
53 sampling number and spatial coverage. The number of such data is 7431 (Supplementary Table  
54 8), accounting for 75% of the Isobe database. The data in different ocean basins are also  
55 comparable due to similar methodology.

56 All the data used in this study are reported as numerical concentrations ( $N$ ), which are transferred  
57 to mass concentrations ( $M$ ) following Cozar et al.<sup>6</sup>:

$$58 \quad \log M(g \cdot km^{-2}) = 1.21 \times \log N(items \cdot km^{-2}) - 3.99 \quad (1)$$

59 and are compared with modeled mass concentrations of plastics in the surface ocean. Such a  
60 transfer does not change the number of independent measurements used in this study. The  
61 conversion bears uncertainty but the uncertainty is reduced due to the large sampling number<sup>7</sup>.  
62 The item-mass conversion factors of all observed concentrations range from  $1.3 \times 10^{-5}$  to  $2.4 \times 10^3$   
63 g per item, with a mean value of 31 g per item. However, mass concentrations (or total mass) are  
64 more comparable with plastic emission inventories that are also in a mass unit. Moreover, the  
65 modeled number concentrations are prone to larger uncertainties due to the fragmentation  
66 process, which is mass-conservative but could greatly change the number concentrations<sup>6</sup>.

## 67 **Supplementary Methods**

### 68 Other sources of plastics to the ocean than MPW

69 There are other potential sources contributing to the ocean plastics beyond riverine discharge,  
70 coastal erosions, and marine sources that are considered in this study. One potential source is  
71 atmospheric transport and deposition. The total deposition of plastics to ocean surfaces from land  
72 sources is 13 kilo Mt  $\text{yr}^{-1}$ , much smaller than the three sources mentioned in the main text.  
73 Moreover, there is a suggested net transport of 9 kilo Mt  $\text{yr}^{-1}$  plastics from ocean to land, i.e. the  
74 loss of sea surface ocean plastics to the atmosphere (via mechanical processes similar to sea salt

75 emissions) surpasses that is deposited to the ocean<sup>8</sup>. Another source is direct wastewater to ocean  
 76 by coastal population (other wastewater enters the ocean via rivers, hence being considered in  
 77 this study), which is estimated about 0.44 kilo Mt yr<sup>-1</sup>, even smaller than what we already  
 78 considered<sup>9</sup>. Other plastic sources than mismanaged plastic waste include unintentional plastic  
 79 emissions, such as fibers from textiles, tire wear particles, and lost resin pellets. We assume that  
 80 they have been included in the riverine inventories of plastic waste discharge, as these  
 81 inventories were built upon riverine measurements that cover all plastic types. Natural disasters  
 82 are also potential significant sources. For example, the Fukushima earthquake and tsunami in  
 83 March, 2011 released ~20 million Mt of debris to the ocean<sup>10</sup>. However, the emission of plastic  
 84 waste in such events is poorly quantified at global scale, and its contribution to the ocean plastics  
 85 is rather small given its unusual and episodic nature.

### 86 Stokes drift

87 We take the estimated Stokes drift velocity from the GlobCurrent and apply it to all the plastic  
 88 tracers in our model<sup>11</sup>. The data are available between 1990 and 2015, with a time resolution of 3  
 89 hours. We calculate a 26-year average of the Stokes drift velocity for each month. In this way, 12  
 90 months of Stokes drift velocity is achieved and cycled in the model for the whole simulation  
 91 period. The strongest Stokes drift is simulated in the Southern Ocean and the high-latitude ocean  
 92 in the northern hemisphere where plastic concentrations are relatively low (Supplementary Fig.  
 93 6), consistent with previous results<sup>12</sup>. The modeled plastic accumulation in the subtropical gyres  
 94 is moved westward slightly by Stokes drift, while plastics in the Southern Ocean are moved  
 95 eastward.

### 96 Sinking and rising

97 The sinking/rising rate of plastics depends on its density. Plastic particles in our model are  
 98 treated as spheres. At steady state, the forces acting on plastic particles are balanced:

$$99 \quad \mathbf{F}_D + \mathbf{F}_g + \mathbf{F}_b = 0 \quad (2)$$

100 where  $\mathbf{F}_D$  is vertical dragging force,  $\mathbf{F}_g$  is gravity, and  $\mathbf{F}_b$  is buoyancy. These forces are calculated  
 101 as:

$$102 \quad \mathbf{F}_g = V_p \rho_p \mathbf{g} \quad (3)$$

$$103 \quad \mathbf{F}_b = -V_s \rho_s \mathbf{g} \quad (4)$$

$$104 \quad \mathbf{F}_D = -\frac{1}{2} C_D (\text{Re}_s) A_p \rho_s \frac{(\mathbf{w} - \mathbf{w}_s)^3}{|\mathbf{w} - \mathbf{w}_s|} \quad (5)$$

105 where  $V_p$  is the volume of the particle, while  $V_s$  is the volume of the particle that is submerged in  
 106 seawater ( $V_p = V_s$  in this case, but  $V_p > V_s$  for floating particles with zero sinking/rising velocity  
 107 relative to the seawater, e.g., unbiofouled PP and PE).  $C_D$  is the coefficient of dragging, which is  
 108 a function of the Reynolds number (Re) of a certain motion of a fluid.  $A_p$  is the horizontal  
 109 sectional area of a particle,  $\rho_s$  is the density of seawater,  $\rho_p$  is the mean density of a particle,  $\mathbf{w}$   
 110 is the vertical velocity of the particle,  $\mathbf{w}_s$  is the vertical velocity of seawater, and  $\mathbf{g}$  is the gravity  
 111 acceleration.

112 Based on Supplementary Equation (2)–(5), we get  $(\mathbf{w} - \mathbf{w}_s)^2$ :

$$113 \quad (\mathbf{w} - \mathbf{w}_s)^2 = \frac{4|\mathbf{g}|d(\rho_p - \rho_s)}{3C_D(\text{Re}_s)\rho_s} \quad (6)$$

114 where  $d$  is Stokes diameter of a particle, and  $C_D$  is calculated as<sup>13</sup>:

115 
$$C_D(\text{Re}) = \begin{cases} 24 \text{Re}^{-1} & \text{Re} \leq 0.3 \\ 18.5 \text{Re}^{-0.6} & 0.3 < \text{Re} \leq 1000 \\ 0.44 & 1000 < \text{Re} \leq 20000 \end{cases} \quad (7)$$

116  $\text{Re}_s$  is the Re of seawater and is calculated as:

117 
$$\text{Re}_s = \frac{d \rho_s |\mathbf{w} - \mathbf{u}_s|}{\mu_s} \quad (8)$$

118 Based on Supplementary Equation (6) (7), we get  $\mathbf{w} - \mathbf{w}_s$ :

119 
$$\mathbf{w} - \mathbf{w}_s = \begin{cases} \frac{d^2 g(\rho_p - \rho_s)}{18\mu} & \text{Re} \leq 0.3 \\ \frac{0.153 d^{1.143} [g(\rho_p - \rho_s)]^{0.714}}{\rho_s^{0.286} \mu^{0.429}} & 0.3 < \text{Re} \leq 1000 \\ 1.74 \left( \frac{dg(\rho_p - \rho_s)}{\rho_s} \right)^{\frac{1}{2}} & 1000 < \text{Re} < 200000 \end{cases} \quad (9)$$

120 Supplementary Equation (6) is a piecewise function. The three conditions of different Re are all  
 121 possible in reality because of the variety of particles, but it is hard to know which range of  
 122 Supplementary Equation (6) should be used in a certain situation, since Re should be calculated  
 123 directly by sinking velocity  $\mathbf{w}$ , which is unknown here.

124 Notice that Supplementary Equation (7) can be represented by:

125 
$$C_D = \frac{a}{\text{Re}^b} \begin{cases} a = 24, b = 1 & \text{Re} \leq 0.3 \\ a = 18.5, b = 0.6 & 0.3 < \text{Re} \leq 1000 \\ a = 0.4, b = 0 & 1000 < \text{Re} < 200000 \end{cases} \quad (10)$$

126 Combine Supplementary Equation (6) (8) (10) and eliminate  $|\mathbf{w} - \mathbf{u}_s|$  and  $C_D$ :

127 
$$\text{Re} = \left( \frac{4}{3a} \right)^{\frac{1}{2-b}} \left( d^3 \frac{\rho_s g(\rho_p - \rho_s)}{\mu^2} \right)^{\frac{1}{2-b}} \quad (11)$$

128 Define  $K$ :

129 
$$K = d^3 \frac{\rho_s g(\rho_p - \rho_s)}{\mu^2} \quad (12)$$

130 Then:

131 
$$\text{Re} = \begin{cases} 0.0556K & \text{Re} \leq 0.3 \\ 0.072K^{\frac{5}{7}} & 0.3 < \text{Re} \leq 1000 \\ 1.74K^{\frac{1}{2}} & 1000 < \text{Re} < 200000 \end{cases} \quad (13)$$

132

$$\mathbf{w} - \mathbf{w}_s = \begin{cases} \frac{d^2 g(\rho_p - \rho_s)}{18\mu} & K \leq 5.4 \\ \frac{0.153 d^{1.143} [g(\rho_p - \rho_s)]^{0.714}}{\rho_s^{0.286} \mu^{0.429}} & 5.4 < K \leq 24 \\ 1.74 \left( \frac{dg(\rho_p - \rho_s)}{\rho_s} \right)^{\frac{1}{2}} & K > 24 \end{cases} \quad (14)$$

133

134

135

136

137

138

139

140

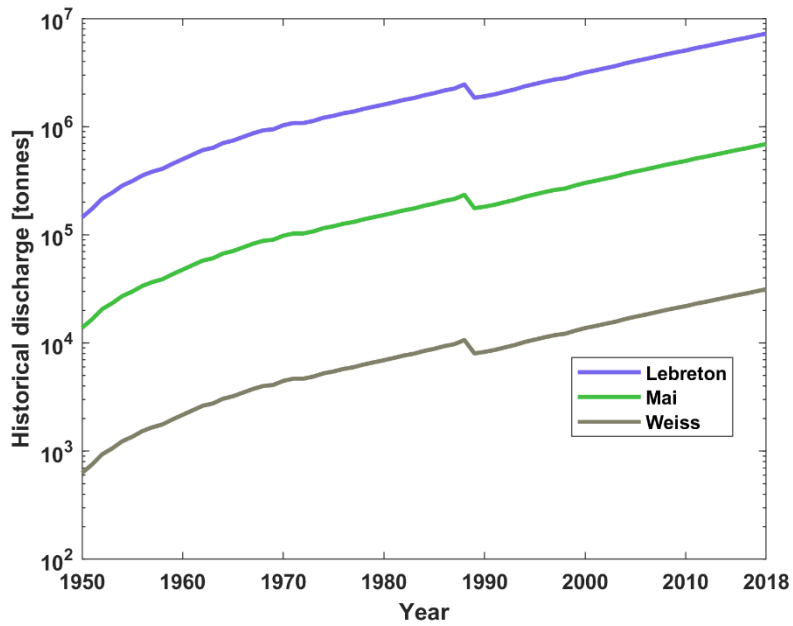

141  
 142 **Supplementary Fig. 1: The historical trends of global total plastic emissions during 1950-**  
 143 **2018 for the High (Lebreton), Middle (Mai), and Low (Weiss) scenarios.** The abrupt decrease  
 144 in the 1980s is associated with the MARPOL Convention that bans the dumping of waste from  
 145 ships.

146  
 147  
 148  
 149  
 150

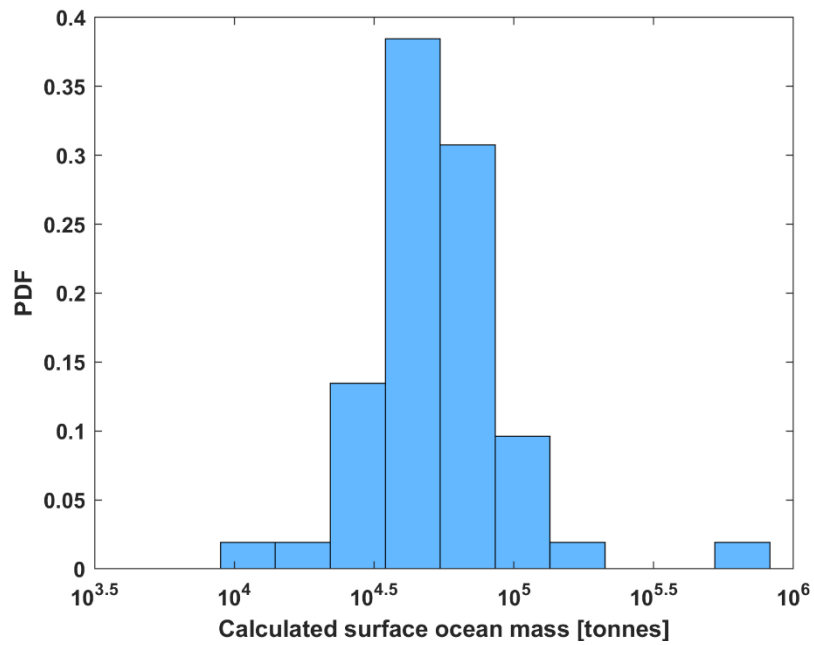

151  
 152 **Supplementary Fig. 2: Probability distribution function of the calculated surface ocean**  
 153 **plastic mass.** The results are from the ensemble members ( $N = 52$ ) driven by the Middle  
 154 emission scenario.

155  
 156  
 157

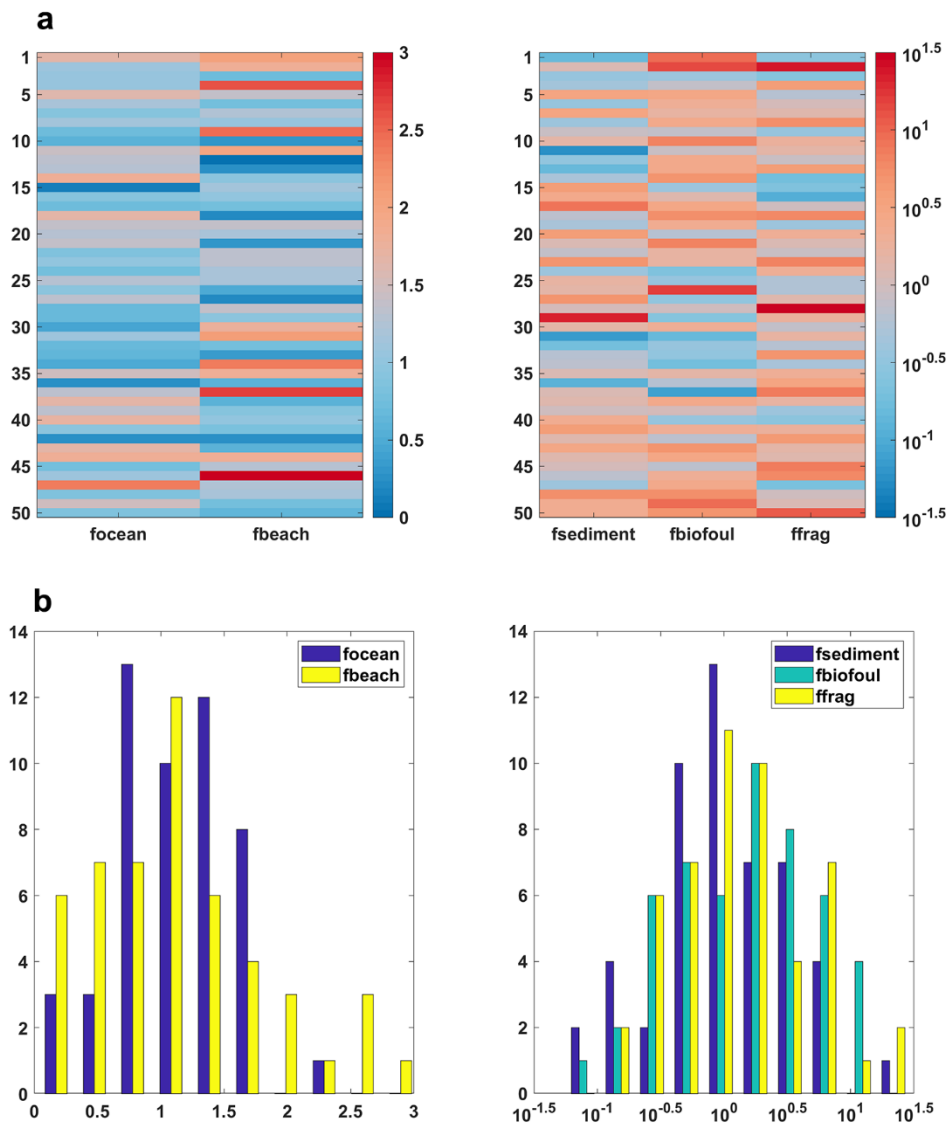

158  
 159 **Supplementary Fig. 3: Parameters of the model ensemble ( $N = 50$ ).** **a** parameter values. **b**  
 160 frequency distributions of the values. Parameters are represented as the ratio to the corresponding  
 161 values in the test case simulation (Table 1), including *focean*: fraction of marine discharge to the  
 162 total discharge; *fbeach*: beaching rate; *fsediment*: sedimentation rate; *fbiofoul*: biofouling rate;  
 163 *ffrag*: fragmentation rate.

164  
 165  
 166



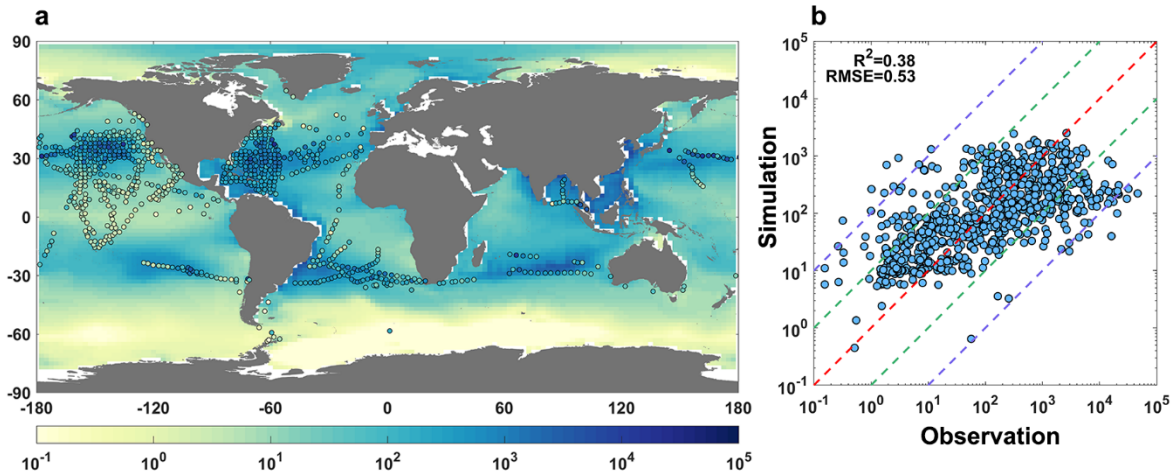

167  
 168 **Supplementary Fig. 4: Comparison between observed and modeled surface ocean plastic**  
 169 **mass concentrations driven by the best-estimate emissions.** The background colors in panel **a**  
 170 are the modeled results, while the circles are observations. The dashed lines in panel **b** are 100:1,  
 171 10:1, 1:1, 1:10, and 1:100. All the concentrations, and the calculation of  $R^2$  and RMSE are in a  
 172 base 10 logarithmic scale with a unit of  $\text{g km}^{-2}$ . The best-estimate emission is close to the middle  
 173 emission scenario and the simulated concentrations in panel **b** are just slightly higher than those  
 174 in Fig. 2e.  
 175

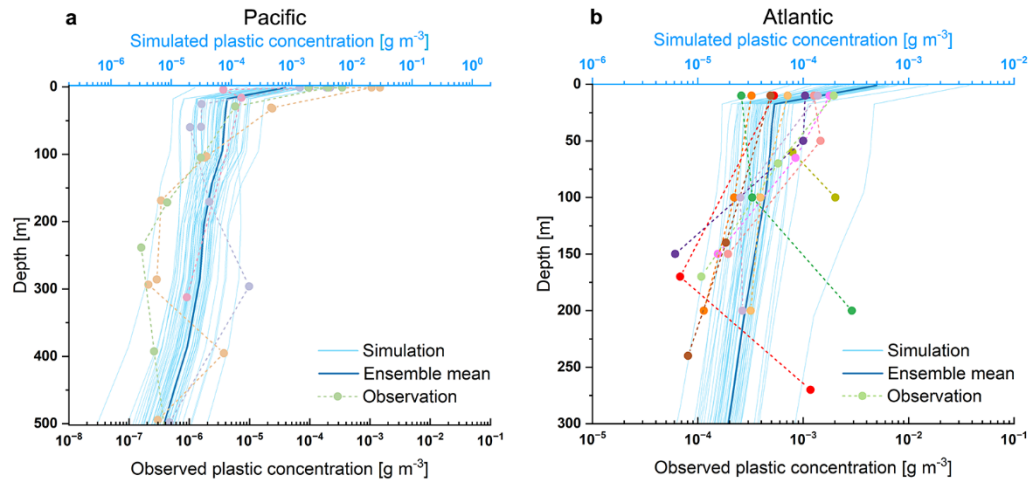

176  
 177 **Supplementary Fig. 5: Comparison between observed and modeled vertical profile of**  
 178 **plastic mass. a Pacific. b Atlantic Ocean.** The dash lines indicate individual observed profiles  
 179 with the filled-colored circles representing sampling depths. The light blue solid lines are the  
 180 mean plastic mass concentrations over the sampling sites by the 52 member models under the  
 181 middle emission scenario (other emission scenarios simulate higher or lower concentrations but  
 182 with similar vertical trends), while the dark blue solid lines are the ensemble means. The  
 183 observations are from Egger et al. (2020) and Pabortsave and Lampitt (2020) for the Pacific and  
 184 Atlantic Ocean, respectively<sup>14,15</sup>.

185  
 186

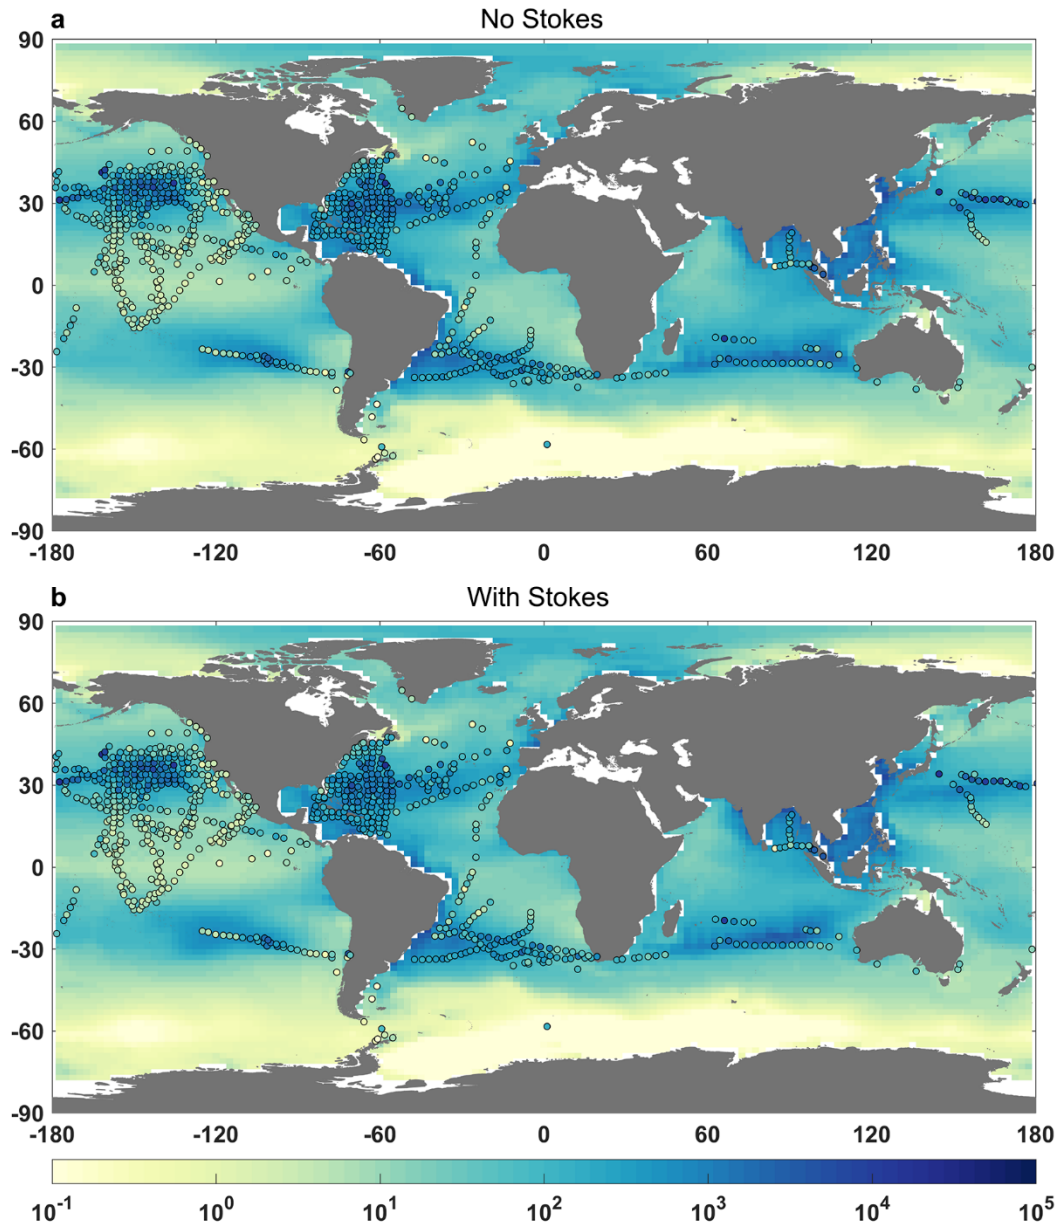

187  
 188 **Supplementary Fig. 6: The modeled spatial pattern of surface plastic abundance. a** Without  
 189 Stokes drift. **b** With Stokes drift. Compared with panel **a**, Stokes drift slightly changes the spatial  
 190 pattern in panel **b**.

191  
 192  
 193

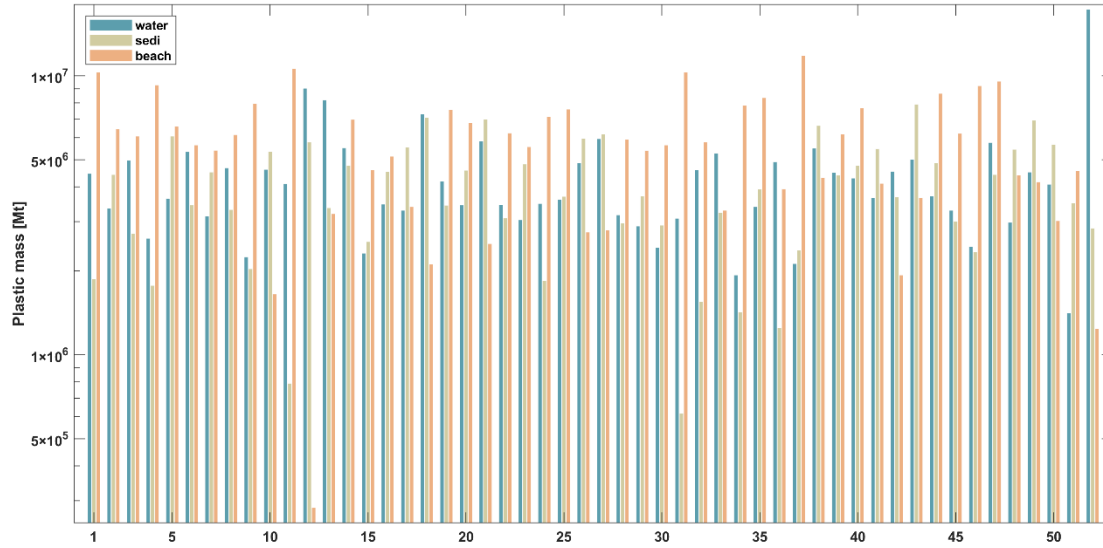

194 **Supplementary Fig. 7: Modeled amount of plastics in the water column, sediments, and**  
 195 **beaches.** The 52 ensemble members are driven by the middle emission scenario. The parameters  
 196 of the model members are listed in Supplementary Table 7.  
 197

198  
 199  
 200  
 201  
 202  
 203  
 204  
 205  
 206  
 207  
 208  
 209  
 210  
 211

212 **Supplementary Table 1.** Mapping of emission inventory to the size bins of our model

| Emission inventory | Model tracers                                        |
|--------------------|------------------------------------------------------|
| Microplastics      | All assumed as the <0.0781-5 mm bin                  |
| Macroplastics      | Equally distributed between 5-50 mm and > 50 mm bins |

213

214

215

216 **Supplementary Table 2.** Fraction of emissions from different continents

|               | Lebreton | Mai    | Weiss  |
|---------------|----------|--------|--------|
| Asia          | 86.00%   | 69.00% | 45.34% |
| Africa        | 7.80%    | 1.55%  | 11.31% |
| North America | 0.95%    | 6.23%  | 14.78% |
| South America | 4.80%    | 21.39% | 17.31% |
| Europe        | 0.28%    | 1.71%  | 10.61% |
| Oceania       | 0.02%    | 0.16%  | 0.65%  |

217

218

219 **Supplementary Table 3.** Consumption of different plastic types around the world in 2013, in the  
220 unit of 10 thousand metric tons<sup>16</sup>.

| Type   | Global | Asia   | North<br>America | Western<br>Europe | Middle<br>East |
|--------|--------|--------|------------------|-------------------|----------------|
| PE     | 8157.8 | 3648.1 | 1557.9           | 1101.2            | 534.5          |
| PP     | 5606.8 | 3070.9 | 720.1            | 737.4             | 375.2          |
| PVC    | 3854.9 | 2192.4 | 514.4            | 402               | 215.9          |
| Others | 2387.3 | 1345.9 | 323.8            | 326.1             | 126            |

221

222

**Supplementary Table 4.** Model parameterization of plastic particle settling.

| Parameter      | Unit                             | Description                                                                                                                                                                                               | Value or formula                                                                                                 |
|----------------|----------------------------------|-----------------------------------------------------------------------------------------------------------------------------------------------------------------------------------------------------------|------------------------------------------------------------------------------------------------------------------|
| $F_D$          | $\text{kg m s}^{-2}$             | Dragging force of seawater (vertical)                                                                                                                                                                     | $F_D = -\frac{1}{2} C_D(\text{Re}_s) A_p \rho_s \frac{(\mathbf{w} - \mathbf{w}_s)}{ \mathbf{w} - \mathbf{w}_s }$ |
| $F_g$          | $\text{kg m s}^{-2}$             | Gravity                                                                                                                                                                                                   | $F_g = V_p \rho_p \mathbf{g}$                                                                                    |
| $F_b$          | $\text{kg m s}^{-2}$             | Buoyancy                                                                                                                                                                                                  | $F_b = -V_s \rho_s \mathbf{g}$                                                                                   |
| $C_D$          | unitless                         | Coefficient of dragging (function of Re)                                                                                                                                                                  | $C_D = C_D(\text{Re})$                                                                                           |
| $\text{Re}_s$  | unitless                         | Reynolds number of seawater                                                                                                                                                                               | $\text{Re}_s = \frac{d \rho_s  \mathbf{w} - \mathbf{w}_s }{\mu_s}$                                               |
| $A_p$          | $\text{m}^2$                     | Sectional area                                                                                                                                                                                            | $A_p = \frac{1}{4} \pi d^2$                                                                                      |
| $d$            | m                                | Stokes diameter (For strict sphere particle, stokes diameter is normal diameter. For other shapes of particles, stokes diameter is the diameter of the sphere particle which has the same sinking speed.) | Model input                                                                                                      |
| $V_p$          | $\text{m}^3$                     | Volume of microplastics particle                                                                                                                                                                          | $V_p = \frac{1}{6} \pi d^3$                                                                                      |
| $V_s$          | $\text{m}^3$                     | Volume of microplastics particle submerged in seawater (when sinking or rising)                                                                                                                           | $V_s = V_p$                                                                                                      |
| $\rho_p$       | $\text{kg m}^{-3}$               | Mean density of particle                                                                                                                                                                                  | Model input                                                                                                      |
| $\rho_s$       | $\text{kg m}^{-3}$               | Density of sea water                                                                                                                                                                                      | Model input                                                                                                      |
| $\mathbf{g}$   | $\text{m s}^{-2}$                | Gravitational acceleration                                                                                                                                                                                | 9.8                                                                                                              |
| $\mu_s$        | $\text{kg m}^{-1} \text{s}^{-1}$ | Dynamic-viscosity coefficient of seawater                                                                                                                                                                 | Model input                                                                                                      |
| $\mathbf{w}$   | $\text{m s}^{-1}$                | Sinking or rising speed (Need also a technique to eliminate Re. Flux of particle and settling of particle also have parameterization)                                                                     | $(\mathbf{w} - \mathbf{w}_s)^2 = \frac{4 \mathbf{g} d(\rho_p - \rho_s)}{3C_D(\text{Re}_s)\rho_s}$                |
| $\mathbf{w}_s$ | $\text{m s}^{-1}$                | Velocity of seawater                                                                                                                                                                                      | Model input                                                                                                      |



**Supplementary Table 5.** Model parameterization of plastic particle drifting.

| Parameter      | Unit                 | Description                                                                        | Value or formula                                                                                                             |
|----------------|----------------------|------------------------------------------------------------------------------------|------------------------------------------------------------------------------------------------------------------------------|
| $\mathbf{F}_s$ | $\text{kg m s}^{-2}$ | Dragging force by sea water (horizontal)                                           | $\mathbf{F}_s = -\frac{1}{2} C_D (\text{Re}_s) A_s \rho_s \frac{(\mathbf{u} - \mathbf{u}_s)^3}{ \mathbf{u} - \mathbf{u}_s }$ |
| $\mathbf{F}_a$ | $\text{kg m s}^{-2}$ | Dragging force by air (horizontal)                                                 | $\mathbf{F}_a = -\frac{1}{2} C_D (\text{Re}_a) A_a \rho_a \frac{(\mathbf{u} - \mathbf{u}_a)^3}{ \mathbf{u} - \mathbf{u}_a }$ |
| $\mathbf{F}_c$ | $\text{kg m s}^{-2}$ | Coriolis force                                                                     | $\mathbf{F}_c = V_p \rho_p f_C \mathbf{u}$                                                                                   |
| $\text{Re}_a$  | unitless             | Reynolds number of seawater                                                        | $\text{Re}_a = \frac{d \rho_a  \mathbf{u} - \mathbf{u}_a }{\mu_a}$                                                           |
| $V_s$          | $\text{m}^3$         | Volume of microplastics particle submerged in sweater                              | $V_s = \frac{1}{6} \pi d^3 - \pi h^2 \left( \frac{d}{2} - \frac{h_a}{3} \right)$                                             |
| $h_a$          | m                    | height of the upper part (exposed to air)                                          | By solving $\mathbf{F}_g + \mathbf{F}_b = 0$                                                                                 |
| $A_a$          | $\text{m}^2$         | Sectional area of particle exposed to air                                          | $A_a = \frac{1}{4} r^2 (\alpha - \sin \alpha)$<br>$\alpha = 2 \arccos \left( 1 - \frac{2h_a}{d} \right)$                     |
| $A_s$          | $\text{m}^2$         | Sectional area of particle exposed to seawater                                     | $A_s = \frac{1}{4} \pi d^2 - A_a$                                                                                            |
| $\rho_a$       | $\text{kg m}^{-3}$   | Density of air                                                                     | Model input                                                                                                                  |
| $f_C$          | $\text{rad s}^{-1}$  | Coriolis parameter                                                                 | $f_C = 2\Omega \sin \varphi$                                                                                                 |
| $\Omega$       | $\text{rad s}^{-1}$  | Angular speed of the earth                                                         | $7.3 \times 10^{-5}$                                                                                                         |
| $\varphi$      | degree               | Latitude                                                                           | Model grid                                                                                                                   |
| $\mathbf{u}$   | $\text{m s}^{-1}$    | Drifting speed (using gradient descent and fourth-order Adams method to calculate) | $m \frac{d\mathbf{u}}{dt} = \mathbf{F}_s + \mathbf{F}_a + \mathbf{F}_c$                                                      |

**Supplementary Table 6.** Model parameterization of plastic particle biofouling and defouling<sup>17</sup>.

| Parameter           | Unit               | Description                                                           | Value or formula                                                               |
|---------------------|--------------------|-----------------------------------------------------------------------|--------------------------------------------------------------------------------|
| $V_{bf}$            | $m^3$              | Volume of biofilm                                                     | $\frac{dV_{bf}}{dt} = V_a \theta_p \frac{dA}{dt} + V_a A \frac{d\theta_p}{dt}$ |
| $V_a$               | $m^3$              | Individual algae volume                                               | $2.0 \times 10^{-16}$                                                          |
| $A$                 | $\# m^{-2}$        | the biomass of attached algae                                         | $\frac{dA}{dt} = \frac{\beta_a A_a}{\theta_p} - m_a A$                         |
| $\theta_p$          | $m^2$              | surface area of plastic particle                                      | Model input                                                                    |
| $\beta_a$           | $m^3 s^{-1}$       | Encounter kernel rate                                                 | $\beta_a = \beta_{brownian} + \beta_{shear}$                                   |
| $A_a$               | $\# m^{-3}$        | Ambient algae concentration                                           | Model input                                                                    |
| $m_a$               | $s^{-1}$           | Mortality rate                                                        | $4.5 \times 10^{-6}$                                                           |
| $\beta_{brownian}$  | $m^3 s^{-1}$       | Brownian motion frequencies                                           | $\beta_{brownian} = 4\pi(D_p + D_a)(r_p + r_a)$                                |
| $\beta_{shear}$     | $m^3 s^{-1}$       | Advective shear collision frequencies                                 | $\beta_{shear} = 1.3\gamma(r_p + r_a)^3$                                       |
| $D_p$               | $m^2 s^{-1}$       | Diffusivity of plastics                                               | $D_p = \frac{k(T + 273.16)}{6\pi\mu_{sw}r_p}$                                  |
| $D_a$               | $m^2 s^{-1}$       | Diffusivity of individual algae cells                                 | $D_a = \frac{k(T + 273.16)}{6\pi\mu_{sw}r_a}$                                  |
| $r_p$               | m                  | radius of plastics                                                    | Model input                                                                    |
| $r_a$               | m                  | radius of algae cells                                                 | Model input                                                                    |
| $k$                 | $kg m^{-1} s^{-1}$ | Boltzmann constant                                                    | $1.3806 \times 10^{-23}$                                                       |
| T                   | $^{\circ}C$        | Seawater temperature                                                  | Model input                                                                    |
| $\rho_{bf}$         | $kg m^{-3}$        | Algae density                                                         | 1388                                                                           |
| $\gamma$            | $s^{-1}$           | Shear rate                                                            | 1.9676                                                                         |
| $\mu_{sw}$          | $kg m^{-1} s^{-1}$ | Dynamic water viscosity                                               | $1.174 \times 10^{-3}$                                                         |
| $\tau_{trans}$      | $s^{-1}$           | Fraction of transformation between biofouled and unbiofouled plastics | $\tau_{trans} = \delta \frac{\frac{dV_{bf}}{dt}}{\Delta V}$                    |
| $\Delta V$          | $m^3$              | Deviation of volume between the two plastics                          | Calculate in the model                                                         |
| $V_{PE_{neutral}}$  | $m^3$              | Volume of a neutral PE particle                                       | $\frac{4}{3}\pi r_{PE_{neutral}}^3$                                            |
| $V_{PE_{floating}}$ | $m^3$              | Volume of a floating PE particle                                      | $\frac{4}{3}\pi r_{PE_{floating}}^3$                                           |

231 **Supplementary Table 7.** Parameters of ensemble model members used in this study (ratios to  
 232 those of the test scenario).

| <b>No.</b> | <b>focean<sup>a</sup></b> | <b>fbeach<sup>b</sup></b> | <b>fsediment<sup>c</sup></b> | <b>fbiofoul<sup>d</sup></b> | <b>ffrag<sup>e</sup></b> |
|------------|---------------------------|---------------------------|------------------------------|-----------------------------|--------------------------|
| <b>1</b>   | 1.65                      | 2.06                      | 0.15                         | 9.37                        | 0.29                     |
| <b>2</b>   | 1.11                      | 1.82                      | 1.18                         | 14.06                       | 23.78                    |
| <b>3</b>   | 1.07                      | 0.73                      | 0.38                         | 0.41                        | 0.27                     |
| <b>4</b>   | 1.04                      | 2.58                      | 0.44                         | 0.72                        | 3.83                     |
| <b>5</b>   | 1.61                      | 1.36                      | 3.26                         | 2.72                        | 0.64                     |
| <b>6</b>   | 1.21                      | 0.78                      | 0.35                         | 2.08                        | 1.08                     |
| <b>7</b>   | 0.91                      | 1.22                      | 3.12                         | 1.57                        | 1.25                     |
| <b>8</b>   | 1.14                      | 1.04                      | 0.41                         | 2.47                        | 5.06                     |
| <b>9</b>   | 0.73                      | 2.45                      | 0.82                         | 0.76                        | 0.36                     |
| <b>10</b>  | 0.60                      | 0.29                      | 1.50                         | 6.29                        | 1.84                     |
| <b>11</b>  | 1.43                      | 2.01                      | 0.06                         | 0.82                        | 1.50                     |
| <b>12</b>  | 1.36                      | 0.02                      | 0.31                         | 2.49                        | 0.87                     |
| <b>13</b>  | 1.28                      | 0.28                      | 0.15                         | 2.40                        | 3.95                     |
| <b>14</b>  | 1.82                      | 0.97                      | 0.49                         | 4.54                        | 0.19                     |
| <b>15</b>  | 0.13                      | 1.15                      | 3.95                         | 0.40                        | 0.23                     |
| <b>16</b>  | 0.93                      | 1.01                      | 2.60                         | 1.28                        | 0.11                     |
| <b>17</b>  | 0.73                      | 0.77                      | 8.07                         | 2.87                        | 0.94                     |
| <b>18</b>  | 1.65                      | 0.22                      | 0.67                         | 5.08                        | 5.64                     |
| <b>19</b>  | 1.37                      | 1.37                      | 0.51                         | 2.36                        | 0.39                     |
| <b>20</b>  | 1.29                      | 1.21                      | 3.71                         | 0.61                        | 2.08                     |
| <b>21</b>  | 1.40                      | 0.33                      | 1.20                         | 6.29                        | 1.14                     |
| <b>22</b>  | 0.85                      | 1.34                      | 0.73                         | 1.67                        | 0.86                     |
| <b>23</b>  | 0.99                      | 1.35                      | 4.80                         | 1.68                        | 6.67                     |
| <b>24</b>  | 0.78                      | 1.18                      | 0.38                         | 0.23                        | 2.03                     |
| <b>25</b>  | 1.31                      | 1.22                      | 1.58                         | 0.37                        | 0.56                     |
| <b>26</b>  | 0.95                      | 0.48                      | 1.47                         | 15.23                       | 0.57                     |
| <b>27</b>  | 1.32                      | 0.22                      | 4.67                         | 0.33                        | 1.27                     |
| <b>28</b>  | 0.69                      | 1.38                      | 1.01                         | 0.95                        | 29.82                    |
| <b>29</b>  | 0.68                      | 0.96                      | 21.95                        | 0.27                        | 1.89                     |
| <b>30</b>  | 0.46                      | 1.77                      | 1.46                         | 2.12                        | 0.73                     |
| <b>31</b>  | 1.12                      | 2.10                      | 0.07                         | 0.15                        | 1.61                     |
| <b>32</b>  | 0.67                      | 0.78                      | 0.18                         | 0.35                        | 0.63                     |
| <b>33</b>  | 0.64                      | 0.35                      | 0.62                         | 0.34                        | 4.69                     |
| <b>34</b>  | 0.51                      | 2.36                      | 0.65                         | 0.19                        | 0.49                     |
| <b>35</b>  | 1.47                      | 1.79                      | 1.20                         | 1.39                        | 2.07                     |
| <b>36</b>  | 0.27                      | 0.56                      | 0.12                         | 0.60                        | 2.98                     |
| <b>37</b>  | 1.36                      | 2.72                      | 1.21                         | 0.08                        | 6.99                     |
| <b>38</b>  | 1.64                      | 0.56                      | 1.29                         | 2.45                        | 1.56                     |
| <b>39</b>  | 1.35                      | 0.92                      | 0.96                         | 1.11                        | 0.40                     |
| <b>40</b>  | 1.71                      | 1.00                      | 2.20                         | 0.37                        | 0.29                     |
| <b>41</b>  | 0.95                      | 0.81                      | 3.96                         | 2.01                        | 1.86                     |
| <b>42</b>  | 0.28                      | 0.27                      | 1.26                         | 0.67                        | 4.42                     |
| <b>43</b>  | 1.67                      | 0.56                      | 2.74                         | 4.99                        | 1.45                     |

|                          |      |      |       |       |       |
|--------------------------|------|------|-------|-------|-------|
| <b>44</b>                | 1.81 | 1.80 | 1.28  | 2.74  | 1.25  |
| <b>45</b>                | 0.79 | 1.27 | 1.04  | 0.66  | 7.68  |
| <b>46</b>                | 1.11 | 3.05 | 0.71  | 1.91  | 6.18  |
| <b>47</b>                | 2.36 | 1.23 | 0.40  | 2.52  | 0.22  |
| <b>48</b>                | 0.86 | 1.20 | 5.56  | 5.23  | 0.97  |
| <b>49</b>                | 1.46 | 0.76 | 2.14  | 9.07  | 1.20  |
| <b>50</b>                | 0.85 | 0.62 | 2.28  | 4.66  | 11.56 |
| <b>51</b>                | 0.13 | 3.05 | 21.95 | 15.23 | 29.82 |
| <b>52</b>                | 2.36 | 0.02 | 0.06  | 0.08  | 0.11  |
| <b>mean<sup>f</sup></b>  | 1.11 | 1.18 | 2.37  | 2.87  | 3.62  |
| <b>stdev<sup>g</sup></b> | 0.50 | 0.77 | 4.28  | 3.70  | 6.53  |

233 <sup>a</sup>fractions of the ocean emission to the total discharge. <sup>b</sup>beaching rate. <sup>c</sup>sedimentation rate.  
234 <sup>d</sup>biofouling rate. <sup>e</sup>fragmentation rate. <sup>f</sup>the mean of all the members. <sup>g</sup>the standard deviation of the  
235 members.  
236  
237  
238

239 **Supplementary Table 8.** summarizes the data sources and measurement procedures.

| Area                                             | Sampling method | Mesh size [mm] | Number of data | Without fiber (%) | Flowmeter        | Identification method | Unit                   | Reference                         |
|--------------------------------------------------|-----------------|----------------|----------------|-------------------|------------------|-----------------------|------------------------|-----------------------------------|
| Eastern N. Pacific                               | N <sup>a</sup>  | 0.335          | 2529           | NR <sup>b</sup>   | W/O <sup>c</sup> | V <sup>e</sup>        | pieces/km <sup>2</sup> | Law et al. 2014 <sup>18</sup>     |
| World's ocean                                    | N               | 0.2            | 1943           | 100 <sup>f</sup>  | W <sup>d</sup>   | V                     | pieces/km <sup>2</sup> | Cozar et al. 2014 <sup>6</sup>    |
| World's ocean                                    | N               | 0.33           | 679            | 100 <sup>g</sup>  | W/O              | V                     | pieces/km <sup>2</sup> | Eriksen et al. 2014 <sup>19</sup> |
| Western N. Atlantic & Caribbean Sea <sup>h</sup> | N               | 0.335          | 2280           | NR                | W/O              | V                     | pieces/km <sup>2</sup> | Law et al. 2010 <sup>20</sup>     |

240 <sup>a</sup>Neuston net, <sup>b</sup>Not recorded, <sup>c,d</sup>Without or with a flowmeter, <sup>e</sup>Visual identification, <sup>f</sup>Fibrous  
 241 microplastics were discarded by this project, <sup>g</sup>The “vast majority” of collected microplastics  
 242 were fragments, <sup>h</sup>Also includes macroplastics.

243  
 244  
 245  
 246

247 **Supplementary References:**

- 248 1. Isobe, A. *et al.* A multilevel dataset of microplastic abundance in the world's upper ocean  
249 and the Laurentian Great Lakes. *Microplastics and Nanoplastics* **1** (2021).
- 250 2. Song, Y. K. *et al.* A comparison of microscopic and spectroscopic identification methods  
251 for analysis of microplastics in environmental samples. *Marine Pollution Bulletin* **93**,  
252 202-209 (2015).
- 253 3. Bai, M., Lin, Y., Hurley, R. R., Zhu, L. & Li, D. Controlling factors of microplastic  
254 riverine flux and implications for reliable monitoring strategy. *Environmental Science &*  
255 *Technology* **56**, 48–61 (2021).
- 256 4. Eriksen, M. *et al.* Microplastic pollution in the surface waters of the Laurentian Great  
257 Lakes. *Marine Pollution Bulletin* **77**, 177-182 (2013).
- 258 5. Hidalgo-Ruz, V., Gutow, L., Thompson, R. C. & Thiel, M. Microplastics in the marine  
259 environment: A review of the methods used for identification and quantification.  
260 *Environmental Science & Technology* **46**, 3060–3075 (2012).
- 261 6. Cozar, A. *et al.* Plastic debris in the open ocean. *Proceedings of the National Academy of*  
262 *Sciences* **111**, 10239-10244, doi:10.1073/pnas.1314705111 (2014).
- 263 7. Roebroek, C. T. J., Laufkötter, C., González-Fernández, D. & van Emmerik, T. The quest  
264 for the missing plastics: Large uncertainties in river plastic export into the sea.  
265 *Environmental Pollution* **312** (2022).
- 266 8. Brahney, J. *et al.* Constraining the atmospheric limb of the plastic cycle. *Proceedings of*  
267 *the National Academy of Sciences* **118** (2021).
- 268 9. Weiss, L. *et al.* The missing ocean plastic sink: Gone with the rivers. *Science* **373**, 107-  
269 111 (2021).
- 270 10. BBC NEWS. *Japan's tsunami debris: Five remarkable stories*,  
271 <<https://www.bbc.com/news/world-asia-35638091>> (2016).
- 272 11. GlobCurrent. *Data catalogue*, <[http://globcurrent.ifremer.fr/products-data/data-](http://globcurrent.ifremer.fr/products-data/data-catalogue)  
273 [catalogue](http://globcurrent.ifremer.fr/products-data/data-catalogue)> (2013).
- 274 12. Carrasco, A., Semedo, A., Isachsen, P. E., Christensen, K. H. & Saetra, Ø. Global surface  
275 wave drift climate from ERA-40: the contributions from wind-sea and swell. *Ocean*  
276 *Dynamics* **64** (2014).
- 277 13. Khalaf, H. K. *The theoretical investigation of drag coefficient and settling velocity*  
278 *correlations* Master thesis, Nahrain University, (2009).
- 279 14. Egger, M., Sulu-Gambari, F. & Lebreton, L. First evidence of plastic fallout from the  
280 North Pacific Garbage Patch. *Scientific Reports* **10** (2020).
- 281 15. Pabortsava, K. & Lampitt, R. S. High concentrations of plastic hidden beneath the surface  
282 of the Atlantic Ocean. *Nature Communications* **11** (2020).
- 283 16. China Plastic. *China plastics industry yearbook*. (China Petrocheical Press, 2014).
- 284 17. Kooi, M., Van Nes, E. H., Scheffer, M. & Koelmans, A. A. Ups and downs in the ocean:  
285 Effects of biofouling on the vertical transport of microplastics. *Environmental Science &*  
286 *Technology* **51**, 7963–7971 (2017).
- 287 18. Law, K. L. *et al.* Distribution of surface plastic debris in the eastern Pacific Ocean from  
288 an 11-Year data set. *Environmental Science & Technology* **48**, 4732-4738 (2014).
- 289 19. Eriksen, M. *et al.* Plastic pollution in the world's oceans: More than 5 trillion plastic  
290 pieces weighing over 250,000 tons afloat at sea. *PloS one* **9**, e111913 (2014).
- 291 20. Law, K. L. *et al.* Plastic Accumulation in the North Atlantic Subtropical Gyre. *Science*  
292 **329**, 1185-1188 (2010).
